# Supplementary material for: Newly self-administered two-step tool for screening cognitive function in an ageing Chinese population: an exploratory cross-sectional study
Source: HighWire-hosted journal article supplement (doi:10.1136/gpsych-2022-100837), 2023-02-01
Supplement: gpsych-2022-100837supp001_data_supplement.pdf [file gpsych-2022-100837supp001_data_supplement.pdf]

## Supplementary Content

**eFigure 1.** Selection flowchart and included modules

**eTABLE 1.** Descriptions of tasks and outcomes and main cognitive domains assessed

**eTABLE 2.** Partial correlation analysis (with age and years of education as the control factors) correlation coefficients of the Chinese Version of Montreal Cognitive Assessment scores of each task component of TCSA

eFigure 1. Selection flowchart and included modules

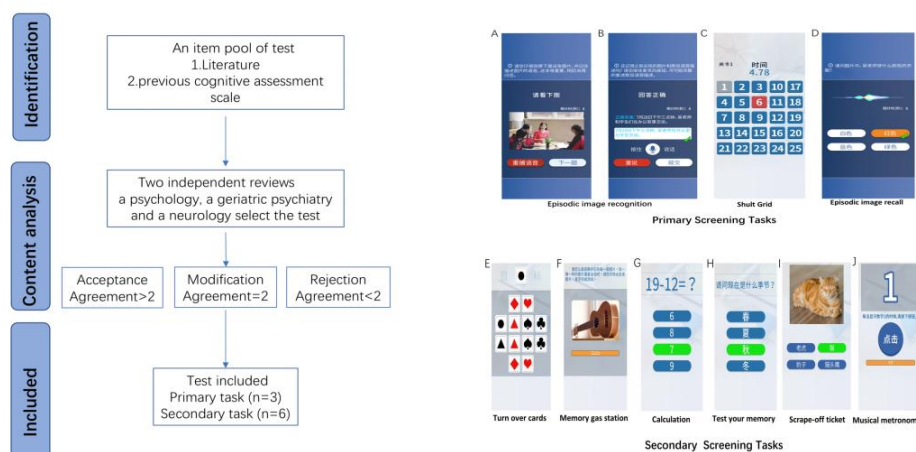

Notes: The final included tasks showing in the right panel of figure. The upper figure showed the primary screening task(A-D), the secondary tasks including E-J.

eTABLE 1 Descriptions of tasks and outcomes and main cognitive domains assessed

| Tasks and actions                                                                                                                                                                                 | Outcome measures                                                                             | Cognitive function assessed        |
|---------------------------------------------------------------------------------------------------------------------------------------------------------------------------------------------------|----------------------------------------------------------------------------------------------|------------------------------------|
| <b>Primary screening task</b>                                                                                                                                                                     |                                                                                              |                                    |
| <b>Task1 Episodic image recognition</b><br>Participants must observe pictures and listen to the description of the image carefully and then need to repeat the recording as precisely as possible | Time on the task 1<br>Task completion: Accuracy of retelling                                 | working memory<br>Episodic memory  |
| <b>Task2 Shult Grid</b><br>Participants are asked to point out the positions with their fingers in the order of 1-9,1-16,1-25                                                                     | Time on the task 2<br>Task completion: Point out number in right order within the fixed time | Vigilance sustained attention      |
| <b>Task3 Episodic image recall</b><br>Participants need to repeat the whole recording and answer the question about a scene that was previously shown to them in the task 1.                      | Time on the task 3<br>Task completion: Number of correct answers                             | Episodic memory recall<br>Language |
| <b>Secondary screening task</b>                                                                                                                                                                   |                                                                                              |                                    |
| <b>Task4 Turn over cards</b><br>Participants must turn over the card which had the same suit to the card they previously saw.                                                                     | Time on the task 4<br>Task completion: Number of turning over the card correctly             | Working memory                     |
| <b>Task 5: Memory gas station</b><br>Participants asked to click on the repeated image in the screen.                                                                                             | Time on the task 5<br>Task completion: Number of choosing the repeated                       | Working memory                     |

|                                                                                                                                                                                |                                                                               |                               |
|--------------------------------------------------------------------------------------------------------------------------------------------------------------------------------|-------------------------------------------------------------------------------|-------------------------------|
|                                                                                                                                                                                | images correctly                                                              |                               |
| <b>Task6: Calculation</b><br>Participants must complete the single-digit addition and multiplication, then choose the option below.                                            | Time on the task 6<br>Task completion: Number of correct calculation          | Calculation                   |
| <b>Task7: Test your memory</b><br>Participants must answer the question about the season and specific data, that is the day, month, year.                                      | Time on the task 7<br>Task completion: Number of choosing the right options   | Orientation                   |
| <b>Task8: Scrape-off ticket</b><br>Participants need to rub the picture with their finger on the screen, then choose the right name consistent with the object in the picture. | Time on the task 8<br>Task completion: Number of choosing the right options   | Language                      |
| <b>Task9: Musical metronome</b><br>Participants must click the button in the middle of the screen when they see the number 1 according to the musical beat.                    | Time on the task 9<br>Task completion: Number of hits at the right time point | Vigilance sustained attention |

**eTable 2.** Partial correlation analysis (with age and years of education as the control factors) correlation coefficients of the Chinese Version of Montreal Cognitive Assessment scores of each task component of TCSA

|                               | Correlation Coefficients |          |
|-------------------------------|--------------------------|----------|
|                               | <i>r</i>                 | <i>p</i> |
| C-MoCA total score            | 0.87                     | <0.001   |
| Language                      | 0.41                     | <0.001   |
| Memory                        |                          |          |
| Working memory                | 0.46                     | <0.001   |
| Short-term memory             | 0.49                     | <0.001   |
| Vigilance sustained attention | 0.74                     | <0.001   |
| Orientation to time and place | 0.87                     | <0.001   |

Notes: C-MoCA, Chinese Version of Montreal Cognitive Assessment;

TCSA, Thoven Cognitive Self-Assessment
